# 1 **Discovery of *Pandoraea pnomenusa* RB38 *N*-acyl homoserine Lactone Synthase (PpnI)** 2 **and its Complete Genome Sequence Analysis**

3 **Kok-Gan Chan<sup>\*</sup>, Robson Ee, Kah-Yan How, Siew-Kim Lee, Wai-Fong Yin and Yan-**  
4 **Lue Lim**

5 Division of Genetics and Molecular Biology, Institute of Biological Sciences, Faculty of  
6 Science, University of Malaya, 50603 Kuala Lumpur, Malaysia

7 E-Mails: yanluelim@hotmail.com (Y.-L.L); robsonee@live.com (R.E);  
8 hkyan@hotmail.com (K.-Y.H); corrinne.sklee@gmail.com (S.-K.L);  
9 yinwaifong@yahoo.com (W.-F.Y)

10 \* Author to whom correspondence should be addressed; E-Mail: kokgan@um.edu.my;  
11 Tel.: +60-37967-5162; Fax: +60-37967-4509.

12

---

13 **Abstract:** In this study, we sequenced the genome of *P. pnomenusa* RB38 and  
14 reported the finding of a pair of cognate *luxI/R* homologs which we firstly coined  
15 as *ppnI*, which is found adjacent to a *luxR* homolog, *ppnR*. An additional orphan  
16 *luxR* homolog, *ppnR2* was also discovered. Multiple sequence alignment revealed  
17 that PpnI is a distinct cluster of AHL synthase compared to those of its nearest  
18 phylogenetic neighbor, *Burkholderia* spp. When expressed heterologously and  
19 analysed using high resolution tandem mass spectrometry, PpnI directs the  
20 synthesis of *N*-octanoylhomoserine lactone (C8-HSL). To our knowledge, this is  
21 the first documentation of the *luxI/R* homologs of the genus of *Pandoraea*.

22 **Keywords:** Quorum sensing; cell-to-cell communication; *N*-acyl homoserine lactone  
23 (AHL); Miseq; PacBio; whole genome mapping (WGM); Opgen; Multi Locus  
24 Sequence Typing (MLST); *ppnI*; *ppnR*

25

---

## 26 **INTRODUCTION**

27           The theory of “quorum sensing” (QS) was coined in the late nineties describing  
28 bacterial cell-to-cell communication for various gene expression regulations (Bainton *et al.*  
29 1992; Miller & Bassler 2001; Schauder & Bassler 2001). This communication is  
30 accomplished through secretion and detection of small hormone-like chemical molecules  
31 known as autoinducers which facilitate intra- and inter-species microbial communications.  
32 There are different classes of autoinducers where upon reaching a threshold concentration,  
33 these signaling molecules activate and stimulate a wide variety of gene expression (Davies *et*  
34 *al.* 1998; Williams *et al.* 2007). The most studied QS molecules is *N*-acyl homoserine lactone  
35 (AHL) which is secreted by Gram-negative proteobacteria especially in the class of alpha-,  
36 beta- and gamma-proteobacteria subdivisions. AHL typically consists of a homoserine  
37 lactone moiety (Williams *et al.* 2007) and an *N*-acyl side chain with various chain length (C4-  
38 C18), degree of saturation at C-3 position and presence of a hydroxy-, oxo- or no substituent  
39 at the C3 position (Chhabra *et al.* 2005). AHL synthase, also known as the LuxI homologs,  
40 together with the AHL receptor protein known as LuxR homologs, are two typical principal  
41 protein families in AHLs QS system. Briefly, in this QS system, AHLs are secreted by LuxI  
42 homologs until a threshold concentration of AHL is attained before they bind to LuxR  
43 homologs and subsequently activate a cascade of QS-regulated gene expression (Fuqua,  
44 Parsek & Greenberg 2001; Swift *et al.* 2001; Swift *et al.* 1996).

45           *Pandora* was believed to be originated from the term “Pandora box” which referred  
46 to the source of all evil in Greek mythology. Predominantly isolated from cystic fibrosis (CF)  
47 patients, *Pandora* species were also recovered from other clinical specimen and soil  
48 environment (Coenye *et al.* 2000; Daneshvar *et al.* 2001). Clinical manifestations of this  
49 terrorizing pathogen revolved around nosocomial infections with its capability to deteriorate  
50 lung function (Caraher *et al.* 2008; Costello *et al.* 2011; Stryjewski *et al.* 2003) and even  
51 causes multiple organ impairment (Stryjewski *et al.* 2003). However, detailed mechanism of  
52 its colonization remain unknown despite emerging clinical documentations on this respiratory  
53 pathogen (Atkinson *et al.* 2006; Daneshvar *et al.* 2001; Stryjewski *et al.* 2003). To date,  
54 *Pandora* sp. is recognized as one of the less studied CF pathogens that requires further  
55 investigations particularly in its bacterial pathogenicity (Callaghan & McClean 2012). To  
56 aggravate the situation, *Pandora* sp. was often misidentified in many clinical laboratories  
57 leading to the lack of clinical documentation on its virulence potential (Hogardt *et al.* 2009).  
58 On the other hand, *Pandora* sp. have considerable attractions in biotechnological  
59 applications with various degradation abilities such as lignin degradation (Shi *et al.* 2013),

60 polychlorinated biphenyls (PCBs) biodegradation (Dhindwal *et al.* 2011), and sulphur oxidation  
61 (Anandham *et al.* 2008).

62 Previously, we reported the first documentation of *P. pnomenusa* RB38 isolated from  
63 a non-operating landfill site which produce C8-HSL (Ee *et al.* 2014b). As there is no report of  
64 AHL synthase in the *Pandoraea* genus, we sought to identify the presence of the AHL  
65 synthase in the genome of *P. pnomenusa* RB38 and further study it. We started the  
66 experiment by sequencing the complete genome of *P. pnomenusa* RB38 to provide the vital  
67 groundwork to understand this strain comprehensively prior to gene hunting. As QS is well-  
68 known to regulate various gene expressions such as virulence factors, identification of the  
69 LuxI/R homologs will be useful for further investigations on the QS-regulated gene  
70 expression. To our best knowledge, this is the first documentation of the QS system in the  
71 genus of *Pandoraea*.

## 72 **METHODS**

### 73 **Bacterial Strains and Culture Conditions**

74 LB medium (Scharlau, Spain) was used as the only culture media in the experiment.  
75 The AHLs biosensors used in this experiment was *Chromobacterium violaceum* CV026,  
76 *Escherichia coli* [pSB401] and *E. coli* [pSB 1142] while *Erwinia carotovora* GS101 and *E.*  
77 *carotovora* PNP22 was used as the positive and negative control for screening of AHLs  
78 production. All isolates were cultured routinely in Luria-Bertani (LB) agar or broth in 28°C  
79 with exception to *Escherichia coli* [pSB401], *E. coli* [pSB 1142] and *E. coli*  
80 BL21(DE3)pLysS, which were cultured aerobically at 37°C.

### 81 **Complete Genome Sequencing**

82 Complete genome sequencing was performed using Pacific Biosciences (PacBio) RS  
83 II Single Molecule Real Time (SMRT) sequencing technology (Pacific Biosciences, Menlo  
84 Park, CA) as described previously (Chan, Yin & Lim 2014; Ee *et al.* 2014c). Briefly, the  
85 prepared 10-kb template library was sequenced on 4 single molecule real time (SMRT) cells  
86 using P4-C2 chemistry. *De novo* assembly was performed by filtering insert reads using  
87 RS\_filter protocol (version 2.1.1) prior to assembly with Hierarchical Genome Assembly  
88 Process (HGAP) workflow in SMRT portal (version 2.1.1). Gene prediction was conducted  
89 using Prodigal version 2.60 (Hyatt *et al.* 2010).

## 90 Whole Genome Mapping

91 Whole genome mapping was performed using OpGen Argus® system (OpGen,  
92 Gaithersburg, MD) according to manufacturer's instructions. Briefly, high molecular weight  
93 DNA was isolated from single colony of sample strain using Argus High Molecular Weight  
94 (HMW) DNA Isolation Kit. DNA quality and concentration were determined using the Argus  
95 QCard kit. Single DNA molecules were then flowed through a microfluidic channel that was  
96 formed by Channel Forming Device (CFD), and were immobilized on charged glass surface.  
97 By using Enzyme Chooser software, BamHI was selected as the optimal restriction  
98 endonuclease for *P. pnomenusa* RB38, based on the FASTA-formatted sequence generated  
99 from PacBio RS II sequencing technology. The DNA molecules were digested on the glass  
100 surface to maintain the fragment order, and were stained with fluorescence dye. The image of  
101 DNA fragments were captured using fluorescence microscopy and fully automated image-  
102 acquisition software. The single-molecule maps were assembled by overlapping DNA  
103 fragment patterns to produce a whole genome map (WGM) with a minimum of 30X  
104 coverage. The WGM was aligned with PacBio FASTA-formatted sequences using sequence  
105 placement tool in MapSolver software (OpGen, Gaithersburg, MD).

## 106 Identification of Putative *N*-acyl Homoserine Lactone Synthase and Gene Cloning

107 The predicted open reading frames (ORF) were further annotated by comparing  
108 against NCBI-NR (<ftp://ftp.ncbi.nlm.nih.gov/blast/db/>) and Uniprot databases  
109 (<http://www.uniprot.org/>) to locate the AHL synthase. The putative *ppnI* sequence was then  
110 sent to GenScript Inc. for gene cloning service where it was cloned in pUC57 vector  
111 (GeneScript, Piscataway, NJ) prior to direct cloning into pGS-21a expression vector. The  
112 resulting pGS-21a:*ppnI* plasmid was transformed into competent *E. coli* BL21(DE3)pLysS.  
113 Ampicillin (100µg/ml) and chloramphenicol (34µg/ml) (CalBioChem, Merck Millipore,  
114 Billerica, MA) were added for transformation selection purpose.

## 115 Screening of AHL Production

116 Preliminary screening of AHL was performed by streaking transformed *E. coli* with  
117 gene of interest against *C. violaceum* CV026 biosensor prior to 37°C incubation overnight. *E.*  
118 *coli* harboring only vector pGS-21a without the gene of interest was included as negative  
119 control.

AHL extraction was performed as previously described (Ee *et al.* 2014a). Briefly, planktonic culture of transformed *E. coli* with gene of interest was extracted twice with equal volume of acidified ethyl acetate (0.1% glacial acetic acid) and left to complete desiccation until further analysis (Ortori *et al.* 2011).

AHL profile was confirmed using LC-MS/MS triple quadrupole mass spectrometry (Agilent 1290 Infinity LC and Agilent 6490 Triple Quadrupole LC/MS systems, Agilent Technologies, Santa Clara, CA) as described previously (Ee *et al.* 2014a; Lim *et al.* 2014). AHL detection was performed using precursor ion mode where the precursor ion *m/z* value was scanned from 80 to 400. Agilent MassHunter software was used for data analysis.

### Thin Layer Chromatography

Thin layer chromatography was conducted with loading of 25µL of extracted AHLs (in 100µL of ACN) on activated reverse phase C18 TLC plate (TLC aluminium sheets 20cm × 20cm, RP-18 F254s, Merck, Darmstadt, Germany) (Shaw *et al.* 1997). Synthetic AHLs of *N*-octanoyl-L-homoserine lactone (C8-HSL) (Sigma–Aldrich, St Louis, MO) were included as positive control and the chromatography was performed in 60% methanol: 40% water volume. Once completed, the TLC plate was air-dried and seeded with overnight culture of CV026 biosensor before it was left for overnight incubation (Chen *et al.* 2013; Lim *et al.* 2014).

## RESULTS AND DISCUSSION

### Complete Genome Sequencing

In this study, PacBio RSII SMRT sequencing technology was used as the sequencing platform in which the genome of *P. pnomenusa* RB38 was assembled into a single contig (GenBank accession number CP007506.1). With an average coverage of 190-fold, 4755 ORFs were revealed in the 5.3797Mb complete genome of *P. pnomenusa* RB38. By using Gepard (Krumdiek, Arnold & Rattei 2007), a dot matrix analysis was performed on the FASTA formatted sequence file of the genome which confirmed the circular topology of the assembly (data not shown).

This complete genome was then validated using OpGen WGM processed with BamHI. Optical mapping is commonly used as one of the laboratory techniques to provide a structural scaffold for contigs orientation as well as to visually identify errors in genome

assemblies by using constructed whole genome restriction maps (Nagarajan, Read & Pop 2008). Perfect alignment of the WGM (5.146Mb) constructed with the complete genome assembly of *P. pnomenusa* RB38 confirmed the accuracy of the finished genome sequence.

### Multilocus Sequence Typing (MLST)

*Pandoraea* spp. belong to the beta-subclass of Proteobacteria with *Burkholderia* and *Ralstonia* as the closest neighbor (Coenye *et al.* 2000). In clinical microbiology laboratory, *Pandoraea* spp. is often misidentified as *Burkholderia cepacia* complex (Bcc) or *Ralstonia* spp or initially reported as non-fermentative Gram-negative bacilli (Aravena-Román 2008; Coenye *et al.* 2001). Initial annotation of *P. pnomenusa* RB38 complete genome using Rapid Annotation using Subsystem Technology (Version 4.0) (<http://rast.nmpdr.org/rast.cgi>) misidentified *Burkholderia* sp. CCGE1001 as the closest identity. However, isolate identification performed in previous study using 16S rDNA sequencing and Matrix-assisted Laser Desorption Ionization Time-of-Flight Mass Spectrometry (MALDI-TOF MS) identified strain RB38 as *P. pnomenusa* [24].

Multilocus sequence typing (MLST) is considered as the “gold standard” of accurate typing and identification of bacterial species (Larsen *et al.* 2012). As there is currently no MLST studies available for *Pandoraea* species, we employed the *Burkholderia* MLST database as a reference and also to study the possibility of employing *Burkholderia* MLST in distinguishing *Pandoraea* genus effectively. With the availability of the whole genome sequence data for strain RB38, Multilocus Sequence Typing (MLST) analysis was performed (Table 1), where seven conserved housekeeping genes (*atpD*, *gltB*, *gyrB*, *recA*, *phaC*, *lepA* and *trpB*) from genomic sequences of *P. pnomenusa* RB38 were blasted against NCBI-NR database for the nearest identity. As expected, all conserved housekeeping genes with exception of *lepA* gene successfully distinguished *Pandoraea* sp. as the closest organism [24].

| Genes                                        | First Match                |                  |        | Second Match                         |                 |        |
|----------------------------------------------|----------------------------|------------------|--------|--------------------------------------|-----------------|--------|
|                                              | Strain                     | Identities       | Expect | Strain                               | Identities      | Expect |
| <b>ATP synthase beta chain (<i>atpD</i>)</b> | <i>Pandoraea</i> sp. SD6-2 | 444/463 (96%)    | 0      | <i>Burkholderia vietnamiensis</i> G4 | 425/464 (92%),  | 0      |
| <b>Glutamate synthase large</b>              | <i>Pandoraea</i> sp. SD6-2 | 1496/1563 (96%), | 0      | <i>Burkholderia terrae</i>           | 1308/1566 (84%) | 0      |

| subunit ( <i>gltB</i> )                               |                            |                |           |                                         |                |           |
|-------------------------------------------------------|----------------------------|----------------|-----------|-----------------------------------------|----------------|-----------|
| <b>DNA gyrase subunit B(<i>gyrB</i>)</b>              | <i>Pandoraea</i> sp. SD6-2 | 744/825 (90%), | 0         | <i>Burkholderia ambifaria</i> MC40-6    | 657/830 (79%)  | 0         |
| <b>Recombinase A (<i>recA</i>)</b>                    | <i>Pandoraea</i> sp. SD6-2 | 338/349 (97%)  | 0         | <i>Burkholderia rhizoxinica</i> HKI 454 | 305/342 (89%)  | 0         |
| <b>Acetoacetyl-CoA reductase(<i>phaC</i>)</b>         | <i>Pandoraea</i> sp. SD6-2 | 224/247 (91%)  | e-169     | <i>Burkholderia phymatum</i> STM815     | 173/247 (70%)  | e-130     |
| <b>GTP binding protein (<i>lepA</i>)</b>              | Not Found                  | Not Found      | Not Found | Not Found                               | Not Found      | Not Found |
| <b>Tryptophan synthase subunit beta (<i>trpB</i>)</b> | <i>Pandoraea</i> sp. SD6-2 | 384/400 (96%)  | 0         | <i>Ralstonia pickettii</i> 12J          | 335/393 (85%), | 0         |

**Table 1: Multi-Locus Sequence Typing Analysis of *P. pnomenusa* RB38.** Seven housekeeping genes in *P. pnomenusa* RB38 were analyzed where six out of seven conserved genes of *Pandoraea* were successfully distinguished from *Burkholderia*. All six MLST sequences shows an expect-value of 0.0, which reflects high similarity except for acetoacetyl-CoA reductase (*phaC*) that gives the value of expect-value169 for *Pandoraea* sp. SD6-2 and expect-value130 for *Burkholderia phymatum* STM815. As shown below, *P. pnomenusa* RB38 is highly similar to *Pandoraea* sp. SD6-2 with higher identities.

### Identification and *in silico* Analysis of *luxI/R*-Type QS Genes

We previously reported the QS activity of *P. pnomenusa* RB38 (Ee *et al.* 2014b). In this study, we identified the putative *luxI* and *luxR* homologs from the annotated genome. Firstly, a 786 bp putative *N*-acyl homoserine lactone synthase (DA70\_23485) (designated as *ppnI* gene) was identified. Conserved domain analysis of the predicted proteome of this gene indicated presence of autoinducer synthase domain (PFAM signature: PF00765) which further confirmed that this gene is a genuine LuxI homolog. Further, a 702 bp putative cognate LuxR homolog (DA70\_23490) (designated as *ppnR* gene) located in close proximity and in a convergent transcriptional orientation to the *ppnI* gene was also manually identified (**Figure 1**). Presence of LuxR homolog in close proximity to the LuxI homolog is commonly observed in the typical LuxI/LuxR-type QS circuit (Schaefer *et al.* 2013). In order to confirm



the authenticity of this putative LuxR homolog, the predicted protein sequence was scanned and was confirmed to contain the universal conserved domain organization of LuxR proteins namely: the autoinducer binding domain (PFAM03472) and C-terminal DNA-binding domain of LuxR-like proteins (cd06170) (Choi & Greenberg 1992; Fuqua, Parsek & Greenberg 2001; Hanzelka & Greenberg 1995).

In addition, further search in the genome also indicated presence of an additional putative *luxR* homologous gene (designated as *ppnR2*) which was not associated with a *luxI* homolog and is therefore referred in this study as a putative orphan LuxR regulator. Orphan LuxR is hypothesized to occur as a result of genes re-organizations, horizontal gene transfer or independent evolution of transcriptional regulatory circuits (Patankar & González 2009b). Various studies have reported identification of orphan LuxR in numerous bacteria and orphan LuxR was also found to interact with AHLs to regulate a variety of gene expression (Malott *et al.* 2009; Patankar & González 2009a; Subramoni & Venturi 2009)

Furthermore, phylogenetic analyses based on amino acid sequences performed indicated that both the PpnI/PpnR1 pair and the orphan PpnR2 are distant from LuxI or LuxR homologues of its closest phylogenetic neighbour, both *Burkholderia* and *Ralstonia* species (Figures 1, 2, 3). To the best of our knowledge, this is the first documentation of LuxI/R homologs of the *Pandora* species.

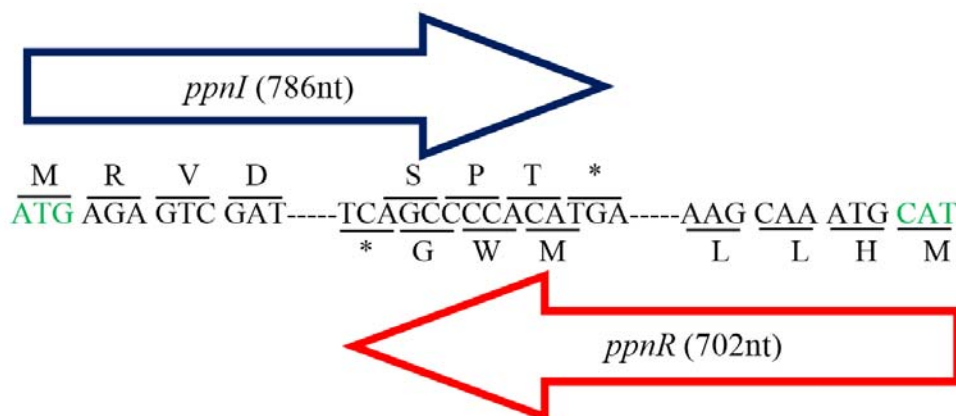

**Figure 1. Gene map showing organization of *ppnR* (*luxR* homolog) and *ppnI* (*luxI* homolog).** The direction of the arrows indicated the orientation of both genes where *ppnI* is in 5'-3' direction while *ppnR* is in 3'-5' direction. A line was used to indicate the nucleotide sequences and its respective amino acid sequence. Start codon, Methionine (M) was



219 represented by green font; while asterisk represented stop codon (TGA). The *ppnR* and *ppnI*  
220 genes sequences had been deposited in GenBank database with GenBank accession number  
221 AHN77102.1 and AHN77101.1, respectively.

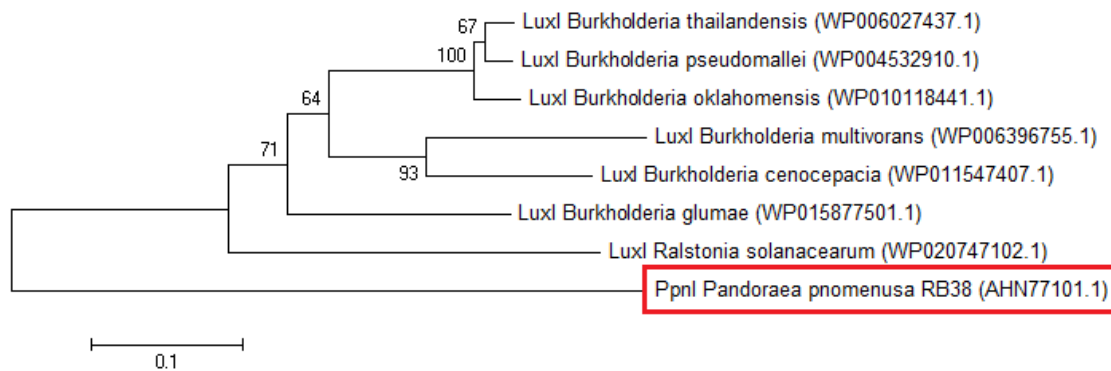

222

223

224 **Figure 2. Phylogenetic tree of PpnI.** Neighbor-Joining method (Saitou & Nei 1987) was  
225 used in MEGA6 (Tamura *et al.* 2011) where bootstrap tests (1000 replicates) were shown  
226 next to the branches (Felsenstein 1985). This analysis involved 8 amino acid sequences with  
227 their GenBank accession numbers as listed: LuxI *Burkholderia thailandensis*  
228 (WP006027437.1), LuxI *Burkholderia pseudomallei* (WP004532910.1), LuxI *Burkholderia*  
229 *oklahomensis* (WP010118441.1), LuxI *Burkholderia multivorans* (WP006396755.1), LuxI  
230 *Burkholderia cenocepacia* (WP015877501.1), LuxI *Burkholderia glumae* (WP015877501.1),  
231 LuxI *Ralstonia solanacearum* (WP020747102.1) and PpnI *Pandoraea pnomenusa* RB38  
232 (AHN77101.1).

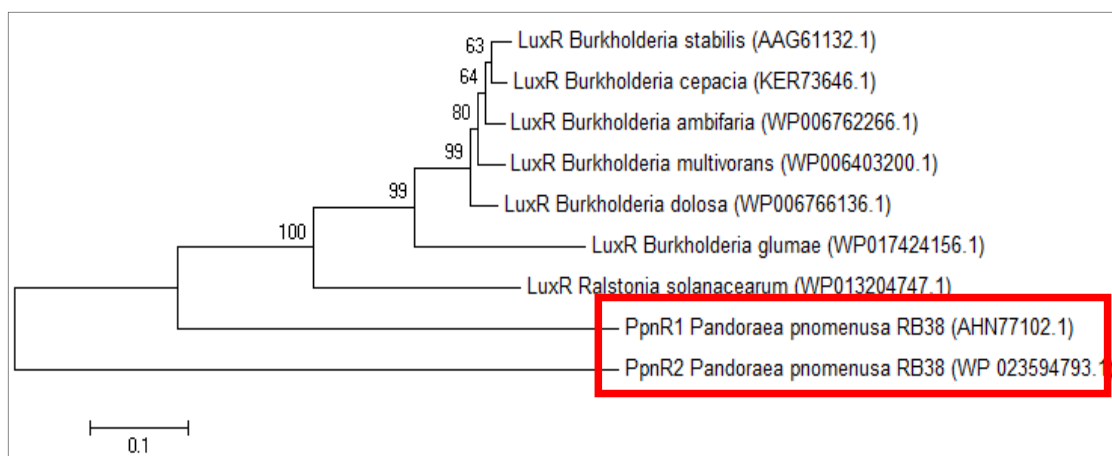

233

**Figure 3. Phylogenetic tree of PpnR.** Neighbor-Joining method (Saitou & Nei 1987) was used in MEGA5 (Tamura *et al.* 2011) where bootstrap tests (1000 replicates) were shown next to the branches (Felsenstein 1985). This analysis involved 9 amino acid sequences with their GenBank accession numbers as listed: LuxR *Burkholderia stabilis* (AAG61132.1), LuxR *Burkholderia cepacia* (KER73646.1), LuxR *Burkholderia ambifaria* (WP006762266.1), LuxR *Burkholderia multivorans* (WP006403200.1), LuxR *Burkholderia dolosa* (WP006766136.1), LuxR *Burkholderia glumae* (WP017424156.1), LuxR *Ralstonia solanacearum* (WP013204747.1), PpnR1 *Pandoraea pnomenusa* RB38 (AHN77102.1) and PpnR2 *Pandoraea pnomenusa* RB38 (WP023594793.1).

### Functional Study of Putative *ppnI* Gene

For functional studies, we cloned the putative *ppnI* into a pGS-21a expression vector and subsequently transformed the pGS-21a::*ppnI* plasmid into competent *E. coli* BL21(DE3)pLysS. AHL screening were performed using *C. violaceum* CV026 biosensor with *E. coli* BL21(DE3)pLysS::*ppnI*. The result of the cross-streak bioassay demonstrated activation of purple violacein secretion of *C. violaceum* CV026 (**Figure 4A**) as well as chemiluminescence activity of *E. coli* [pSB 401] indicating the production of short chain AHLs by the *ppnI* gene (**Figure 4B**). Besides that, formation of a sole purple violacein spot on CV026 lawn which correspond to the same retention time of the synthetic C8-HSL suggested that the *ppnI* is responsible for the production of C8-HSL in *P. pnomenusa* RB38 (**Figure 5**). The AHL profile of *ppnI* was further verified using LC/MS mass spectrometry system and only C8-HSL was detected in the supernatant of transformed *E. coli* BL21 suggesting that *ppnI* is indeed the functional LuxI synthase of *P. pnomenusa* RB38.

**4(A)**

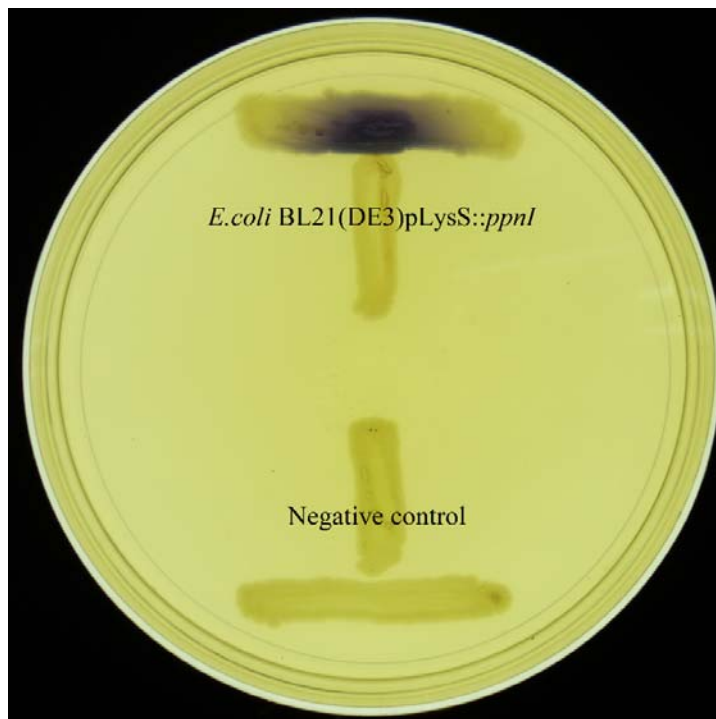

4(B)

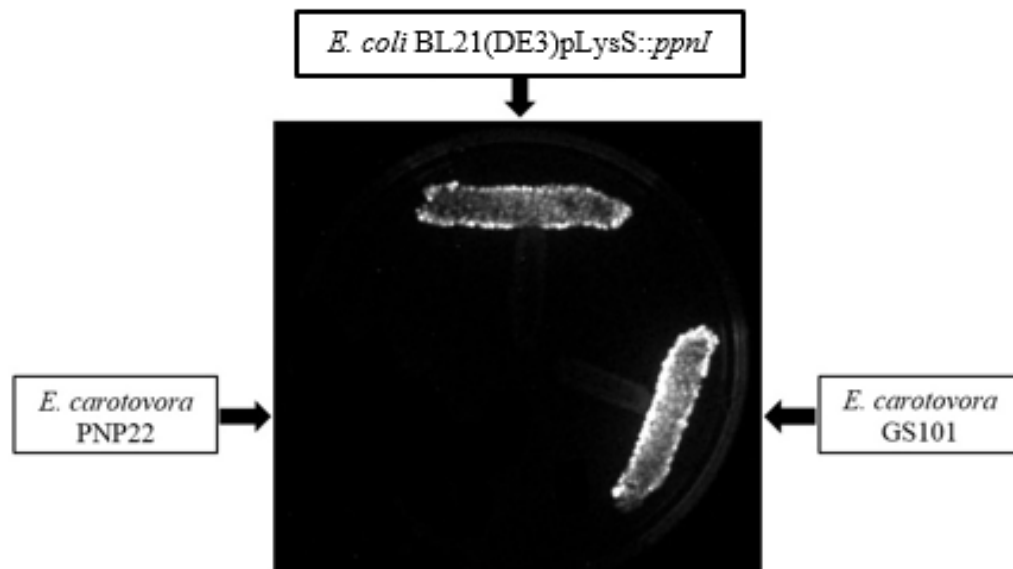

**Figure 4. Cross Streaking bioassay. (A) CV026 bioassay.** Purple pigmentation indicated secretion of short chain AHLs from *E.coli* BL21(DE3)pLysS::ppnI. **(B) *E. coli* [pSB 401] chemiluminescence bioassay.** Expression of chemiluminescence activity in *E. coli* [pSB 401] demonstrated the detection of short chain AHLs. *E. carotovora* GS101 and *E. carotovora* PNP22 served as the positive and negative control respectively in both experiment.

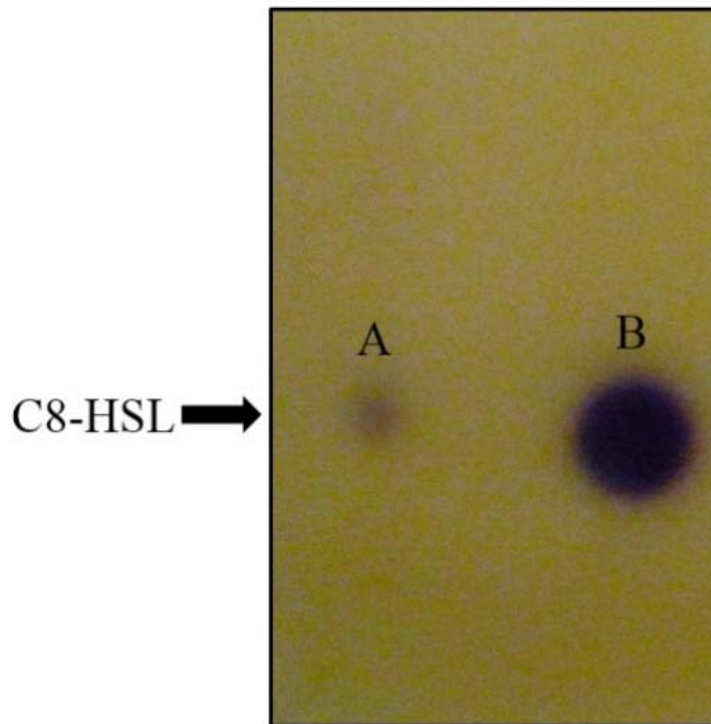

266

267

## 268 Conclusion

269 Here, we reported the complete genome of *P. pnomenusa* RB38 and the discovery of its AHL  
 270 synthase, designated as *ppnI* gene and its LuxR homolog receptor, *ppnR* gene, as well as an  
 271 additional orphan LuxR regulator, *ppnR2* gene. Short chain AHL, C8-HSL was detected in the  
 272 spent culture supernatant of *E.coli* BL21(DE3)pLysS::*ppnI* which confirmed that *ppnI* gene is  
 273 a functional AHL synthase.

## 274 ADDITIONAL INFORMATION AND DECLARATIONS

## 275 Funding

276 This research was supported by the University of Malaya HIR Grant (UM-MOHE HIR Grant  
 277 UM.C/625/1/HIR/MOHE/CHAN/14/1, no. H-50001-A000027; UM-MOHE HIR Grant  
 278 UM.C/625/1/HIR/MOHE/CHAN/01, No. A000001-50001) to Kok-Gan Chan which is  
 279 gratefully acknowledged. We thank Paul Williams (University of Nottingham, UK) for  
 280 providing us the biosensors.

## Author Contributions

Yan-Lue Lim, Robson Ee, Kah-Yan How, Siew-Kim Lee and Wai-Fong Yin performed the research, data analysis and prepared for manuscript. Kok-Gan Chan designed, supervised and approved the experiments.

## Conflicts of Interest

The authors declare no conflict of interest.

## References

- Anandham R, Indiragandhi P, Madhaiyan M, Ryu KY, Jee HJ, Sa TM. 2008.** Chemolithoautotrophic oxidation of thiosulfate and phylogenetic distribution of sulfur oxidation gene (*soxB*) in rhizobacteria isolated from crop plants. *Research in Microbiology* 159:579-589. DOI: 10.1016/j.resmic.2008.08.007.
- Aravena-Román M. 2008.** Cellular fatty acid-deficient *Pandoraea* isolated from a patient with cystic fibrosis. *Journal of Medical Microbiology* 57:252. DOI: 10.1099/jmm.0.47671-0.
- Atkinson RM, Lipuma JJ, Rosenbluth DB, Dunne WM, Jr. 2006.** Chronic colonization with *Pandoraea apista* in cystic fibrosis patients determined by repetitive-element-sequence PCR. *Journal of Clinical Microbiology* 44:833-836. DOI: 10.1128/jcm.44.3.833-836.2006.
- Bainton NJ, Stead P, Chhabra SR, Bycroft BW, Salmond GP, Stewart GS, Williams P. 1992.** *N*-(3-oxohexanoyl)- $\gamma$ -homoserine lactone regulates carbapenem antibiotic production in *Erwinia carotovora*. *Biochemical Journal* 288:997-1004.
- Callaghan M, McClean S. 2012.** Bacterial host interactions in cystic fibrosis. *Current Opinion in Microbiology* 15:71-77. DOI: 10.1016/j.mib.2011.11.001.
- Caraher E, Collins J, Herbert G, Murphy PG, Gallagher CG, Crowe MJ, Callaghan M, McClean S. 2008.** Evaluation of *in vitro* virulence characteristics of the genus *Pandoraea* in lung epithelial cells. *Journal of Medical Microbiology* 57:15-20. DOI: 10.1099/jmm.0.47544-0.
- Chan K-G, Yin W-F, Lim YL. 2014.** Complete genome sequence of *Pseudomonas aeruginosa* strain YL84, a quorum-sensing strain isolated from compost. *Genome Announcements* 2. DOI: 10.1128/genomeA.00246-14.
- Chen JW, Koh C-L, Sam C-K, Yin W-F, Chan K-G. 2013.** Short chain *N*-acyl homoserine lactone production by soil isolate *Burkholderia* sp. strain A9. *Sensors* 13:13217-13227.

- 321 **Chhabra S, Philipp B, Eberl L, Givskov M, Williams P, Cámara M. 2005.** E Extracellular  
322 communication in bacteria. In: Schulz S, ed. *The Chemistry of Pheromones and Other*  
323 *Semiochemicals II*: Springer Berlin Heidelberg, 279-315.
- 324
- 325 **Choi SH, Greenberg EP. 1992.** Genetic dissection of DNA binding and luminescence gene  
326 activation by the *Vibrio fischeri* LuxR protein. *Journal of Bacteriology* 174:4064-  
327 4069.
- 328
- 329 **Coenye T, Falsen E, Hoste B, Ohlen M, Goris J, Govan JR, Gillis M, Vandamme P.**  
330 **2000.** Description of *Pandoraea* gen. nov. with *Pandoraea apista* sp. nov., *Pandoraea*  
331 *pulmonicola* sp. nov., *Pandoraea pnomenusa* sp. nov., *Pandoraea sputorum* sp. nov.  
332 and *Pandoraea norimbergensis* comb. nov. *International Journal of Systemic and*  
333 *Evolutionary Microbiology* 50:887-899.
- 334
- 335 **Coenye T, Liu L, Vandamme P, LiPuma JJ. 2001.** Identification of *Pandoraea* species by  
336 16S ribosomal DNA-based PCR assays. *Journal of Clinical Microbiology* 39:4452-  
337 4455. DOI: 10.1128/jcm.39.12.4452-4455.2001.
- 338
- 339 **Costello A, Herbert G, Fabunmi L, Schaffer K, Kavanagh KA, Caraher EM, Callaghan**  
340 **M, McClean S. 2011.** Virulence of an emerging respiratory pathogen, genus  
341 *Pandoraea*, in vivo and its interactions with lung epithelial cells. *Journal of Medical*  
342 *Microbiology* 60:289-299. DOI: 10.1099/jmm.0.022657-0.
- 343
- 344 **Daneshvar MI, Hollis DG, Steigerwalt AG, Whitney AM, Spangler L, Douglas MP,**  
345 **Jordan JG, MacGregor JP, Hill BC, Tenover FC, Brenner DJ, Weyant RS. 2001.**  
346 Assignment of CDC weak oxidizer group 2 (WO-2) to the genus *Pandoraea* and  
347 characterization of three new *Pandoraea* genomospecies. *Journal of Clinical*  
348 *Microbiology* 39:1819-1826. DOI: 10.1128/jcm.39.5.1819-1826.2001.
- 349
- 350 **Davies DG, Parsek MR, Pearson JP, Iglewski BH, Costerton JW, Greenberg EP. 1998.**  
351 The involvement of cell-to-cell signals in the development of a bacterial biofilm.  
352 *Science* 280:295-298.
- 353
- 354 **Dhindwal S, Patil DN, Mohammadi M, Sylvestre M, Tomar S, Kumar P. 2011.**  
355 Biochemical studies and ligand-bound structures of biphenyl dehydrogenase from  
356 *Pandoraea pnomenusa* strain B-356 reveal a basis for broad specificity of the enzyme.  
357 *The Journal of Biological Chemistry* 286:37011-37022. DOI:  
358 10.1074/jbc.M111.291013.
- 359
- 360 **Ee R, Lim Y-L, Tee K-K, Yin W-F, Chan K-G. 2014a.** Quorum sensing activity of  
361 *Serratia fonticola* strain RB-25 isolated from an ex-landfill site. *Sensors* 14:5136-  
362 5146.
- 363
- 364 **Ee R, Lim YL, Kin LX, Yin WF, Chan KG. 2014b.** Quorum sensing activity in *Pandoraea*  
365 *pnomenusa* RB38. *Sensors* 14:10177-10186. DOI: 10.3390/s140610177.
- 366
- 367 **Ee R, Lim YL, Yin WF, Chan KG. 2014c.** De novo assembly of the quorum-sensing  
368 *Pandoraea* sp. strain RB-44 complete genome sequence using PacBio Single-  
369 Molecule Real-Time sequencing technology. *Genome Announcements* 2. DOI:  
370 10.1128/genomeA.00245-14.



- Felsenstein J. 1985.** Confidence limits on phylogenies: an approach using the bootstrap. *Evolution*:783-791.
- Fuqua C, Parsek MR, Greenberg EP. 2001.** Regulation of gene expression by cell-to-cell communication: acyl-homoserine lactone quorum sensing. *Annual Review of Genetics* 35:439-468. DOI: 10.1146/annurev.genet.35.102401.090913.
- Hanzelka BL, Greenberg EP. 1995.** Evidence that the N-terminal region of the *Vibrio fischeri* LuxR protein constitutes an autoinducer-binding domain. *Journal of Bacteriology* 177:815-817.
- Hogardt M, Ulrich J, Riehn-Kopp H, Tummler B. 2009.** EuroCareCF quality assessment of diagnostic microbiology of cystic fibrosis isolates. *Journal of Clinical Microbiology* 47:3435-3438. DOI: 10.1128/jcm.01182-09.
- Hyatt D, Chen GL, Locascio PF, Land ML, Larimer FW, Hauser LJ. 2010.** Prodigal: prokaryotic gene recognition and translation initiation site identification. *BMC Bioinformatics* 11:119. DOI: 10.1186/1471-2105-11-119.
- Krumsiek J, Arnold R, Rattei T. 2007.** Gepard: a rapid and sensitive tool for creating dotplots on genome scale. *Bioinformatics* 23:1026-1028. DOI: 10.1093/bioinformatics/btm039.
- Larsen MV, Cosentino S, Rasmussen S, Friis C, Hasman H, Marvig RL, Jelsbak L, Sicheritz-Ponten T, Ussery DW, Aarestrup FM, Lund O. 2012.** Multilocus sequence typing of total-genome-sequenced bacteria. *Journal of Clinical Microbiology* 50:1355-1361. DOI: 10.1128/jcm.06094-11.
- Lim Y-L, Ee R, Yin W-F, Chan K-G. 2014.** Quorum sensing activity of *Aeromonas Caviae* strain YL12, a bacterium isolated from compost. *Sensors* 14:7026-7040.
- Malott RJ, O'Grady EP, Toller J, Inhülsen S, Eberl L, Sokol PA. 2009.** A *Burkholderia cenocepacia* orphan LuxR homolog is involved in quorum-sensing regulation. *Journal of Bacteriology* 191:2447-2460. DOI: 10.1128/jb.01746-08.
- Miller MB, Bassler BL. 2001.** Quorum sensing in bacteria. *Annual Review of Microbiology* 55:165-199. DOI: 10.1146/annurev.micro.55.1.165.
- Nagarajan N, Read TD, Pop M. 2008.** Scaffolding and validation of bacterial genome assemblies using optical restriction maps. *Bioinformatics* 24:1229-1235. DOI: 10.1093/bioinformatics/btn102.
- Ortori CA, Dubern JF, Chhabra SR, Camara M, Hardie K, Williams P, Barrett DA. 2011.** Simultaneous quantitative profiling of *N*-acyl- $\gamma$ -homoserine lactone and 2-alkyl-4(1*H*)-quinolone families of quorum-sensing signaling molecules using LC-MS/MS. *Analytical and Bioanalytical Chemistry* 399:839-850. DOI: 10.1007/s00216-010-4341-0.



- Patankar AV, González JE. 2009a.** An orphan LuxR homolog of *Sinorhizobium meliloti* affects stress adaptation and competition for nodulation. *Applied and Environmental Microbiology* 75:946-955. DOI: 10.1128/aem.01692-08.
- Patankar AV, González JE. 2009b.** Orphan LuxR regulators of quorum sensing. *FEMS Microbiology Reviews* 33:739-756. DOI: 10.1111/j.1574-6976.2009.00163.x.
- Saitou N, Nei M. 1987.** The neighbor-joining method: a new method for reconstructing phylogenetic trees. *Molecular Biology and Evolution* 4:406-425.
- Schaefer AL, Lappala CR, Morlen RP, Pelletier DA, Lu TY, Lankford PK, Harwood CS, Greenberg EP. 2013.** LuxR- and LuxI-type quorum-sensing circuits are prevalent in members of the *Populus deltoides* microbiome. *Applied and Environmental Microbiology* 79:5745-5752. DOI: 10.1128/aem.01417-13.
- Schauder S, Bassler BL. 2001.** The languages of bacteria. *Genes & Development* 15:1468-1480. DOI: 10.1101/gad.899601.
- Shaw PD, Ping G, Daly SL, Cha C, Cronan JE, Jr., Rinehart KL, Farrand SK. 1997.** Detecting and characterizing *N*-acyl-homoserine lactone signal molecules by thin-layer chromatography. *Proceedings of National Academy of Sciences* 94:6036-6041.
- Shi Y, Chai L, Tang C, Yang Z, Zheng Y, Chen Y, Jing Q. 2013.** Biochemical investigation of kraft lignin degradation by *Pandoraea* sp. B-6 isolated from bamboo slips. *Bioprocess and Biosystem Engineering* 36:1957-1965. DOI: 10.1007/s00449-013-0972-9.
- Stryjewski ME, LiPuma JJ, Messier RH, Jr., Reller LB, Alexander BD. 2003.** Sepsis, multiple organ failure, and death due to *Pandoraea pnomenusa* infection after lung transplantation. *Journal of Clinical Microbiology* 41:2255-2257.
- Subramoni S, Venturi V. 2009.** LuxR-family 'solos': bachelor sensors/regulators of signalling molecules. *Microbiology* 155:1377-1385. DOI: 10.1099/mic.0.026849-0.
- Swift S, Downie JA, Whitehead NA, Barnard AM, Salmond GP, Williams P. 2001.** Quorum sensing as a population-density-dependent determinant of bacterial physiology. *Advances in Microbial Physiology* 45:199-270.
- Swift S, Throup JP, Williams P, Salmond GP, Stewart GS. 1996.** Quorum sensing: a population-density component in the determination of bacterial phenotype. *Trends in Biochemical Sciences* 21:214-219.
- Tamura K, Peterson D, Peterson N, Stecher G, Nei M, Kumar S. 2011.** MEGA5: molecular evolutionary genetics analysis using maximum likelihood, evolutionary distance, and maximum parsimony methods. *Molecular Biology and Evolution* 28:2731-2739. DOI: 10.1093/molbev/msr121.
- Williams P, Winzer K, Chan WC, Camara M. 2007.** Look who's talking: communication and quorum sensing in the bacterial world. *Philosophical Transactions of the Royal*

469        *Society of London. Series B, Biological Sciences* 362:1119-1134. DOI:  
470        10.1098/rstb.2007.2039.

471  
472

473
